# Supplementary material for: A MoS2 Nanosheet-Based Fluorescence Biosensor for Simple and Quantitative Analysis of DNA Methylation
Source: MDPI journal article supplement (doi:10.3390/s16101561), 2016-09-22
Supplement: s1 [file s1]

# Supplementary Materials: A MoS<sub>2</sub> Nanosheet-Based Fluorescence Biosensor for Simple and Quantitative Analysis of DNA Methylation

Le Xiao, Li Xu, Chuan Gao, Yulin Zhang, Qunfeng Yao and Guo-Jun Zhang

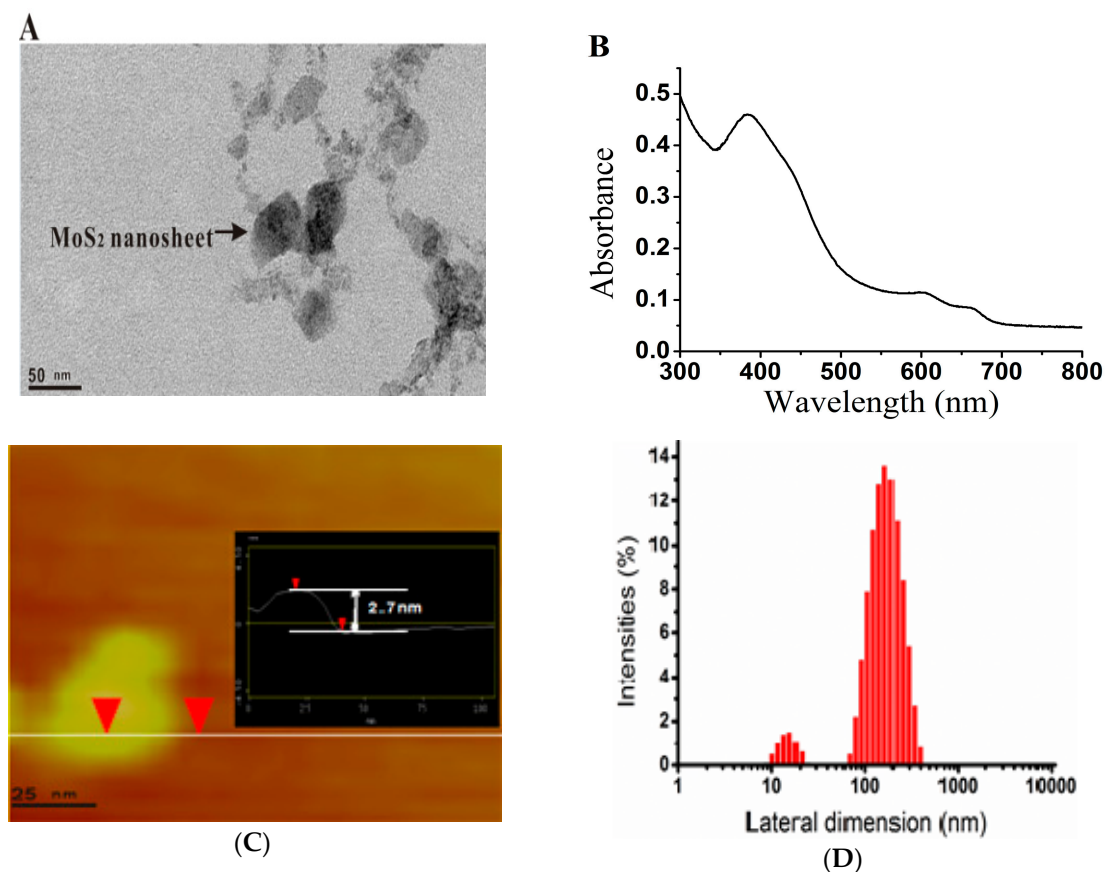

**Figure S1.** Characterization of the MoS<sub>2</sub> nanosheets. (A) TEM image of MoS<sub>2</sub>; (B) UV-visible absorption spectrum of MoS<sub>2</sub>; (C) AFM image and height profile (inset) of MoS<sub>2</sub>; (D) The lateral dimension distribution of MoS<sub>2</sub>.

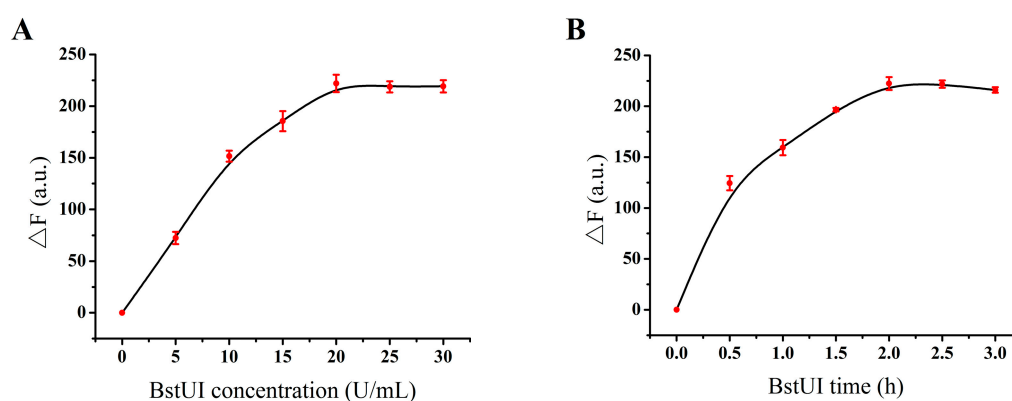

**Figure S2.** Effect of different BstUI endonuclease concentrations (A) and cleavage reaction time (B) on  $\Delta F$ . Error bars show the standard deviation of three experiments.

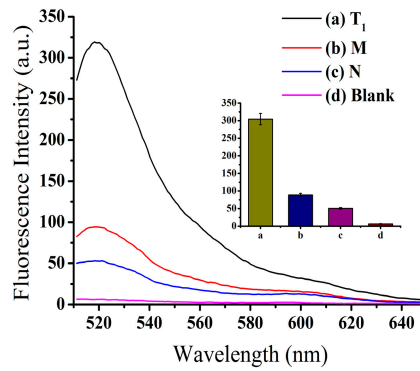

**Figure S3.** The specificity of detection of target DNA. Fluorescence emission spectra in the presence of (a) complementary unmethylated target DNA ( $T_1$ ); (b) one-base mismatched DNA (M); (c) noncomplementary DNA (N) and (d) blank. The inset shows the histogram corresponds to the fluorescence spectra in fluorescence emission spectra. Error bars represent the standard deviation of three experiments.
